# Supplementary material for: FGF9/FGFR1 promotes cell proliferation, epithelial-mesenchymal transition, M2 macrophage infiltration and liver metastasis of lung cancer
Source: PubMed Central journal article supplement — Transl Oncol. 2021 Aug 23;14(11):101208. doi: 10.1016/j.tranon.2021.101208 (PMC8390529; doi:10.1016/j.tranon.2021.101208), 2021-08-23
Supplement: mmc4.pdf [file mmc4.pdf]

## Supplementary Figure S1

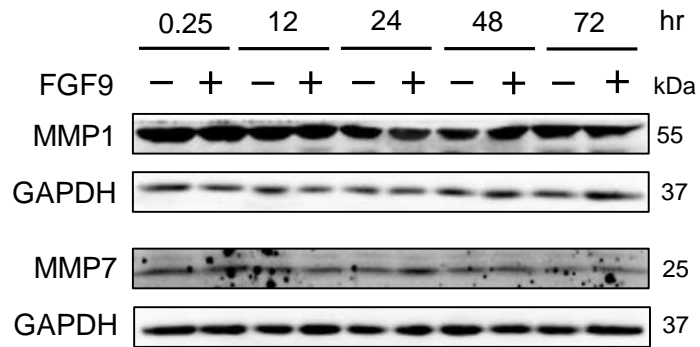

**Figure S1.** Western blot analysis for protein expression of MMP1 and MMP7 in LLC cells treated with 50 ng/ml FGF9 or BSA for 0.25, 12, 24, 48 and 72 hours, respectively. GAPDH protein expression served as an internal control.

## Supplementary Figure S2

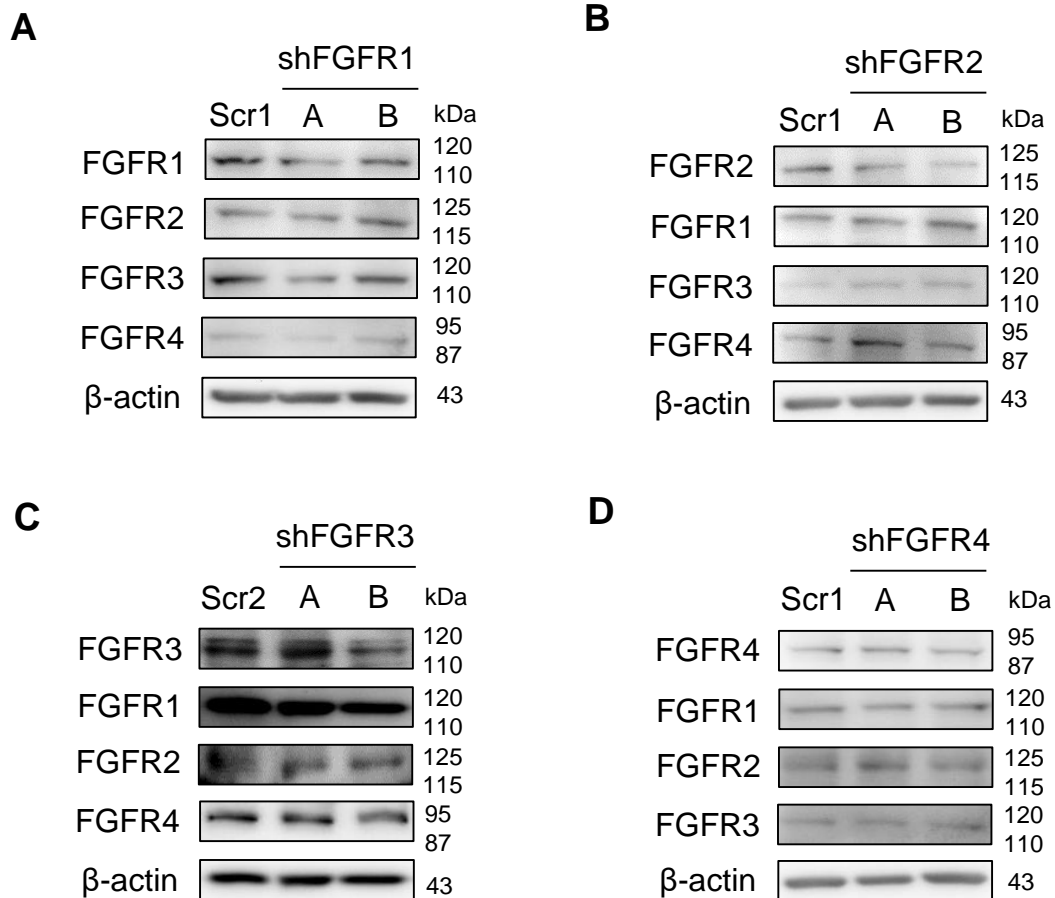

**Figure S2.** Western blot analysis for gene silencing verification at protein level of FGFR1-4 in LLC cells transfected with a specific shRNA against (A) FGFR1, (B) FGFR2, (C) FGFR3, and (D) FGFR4. Two different shRNA targeted sequences were used for each FGF receptor (Table S3). Cells transfected with a non-silencing (scrambled sequence) shRNA in the PLKO.TRC1-puro (Scr1) or PLKO.TRC2-puro (Scr2) vector were used as control as indicated. GAPDH protein expression serves as an internal control.

## Supplementary Figure S3

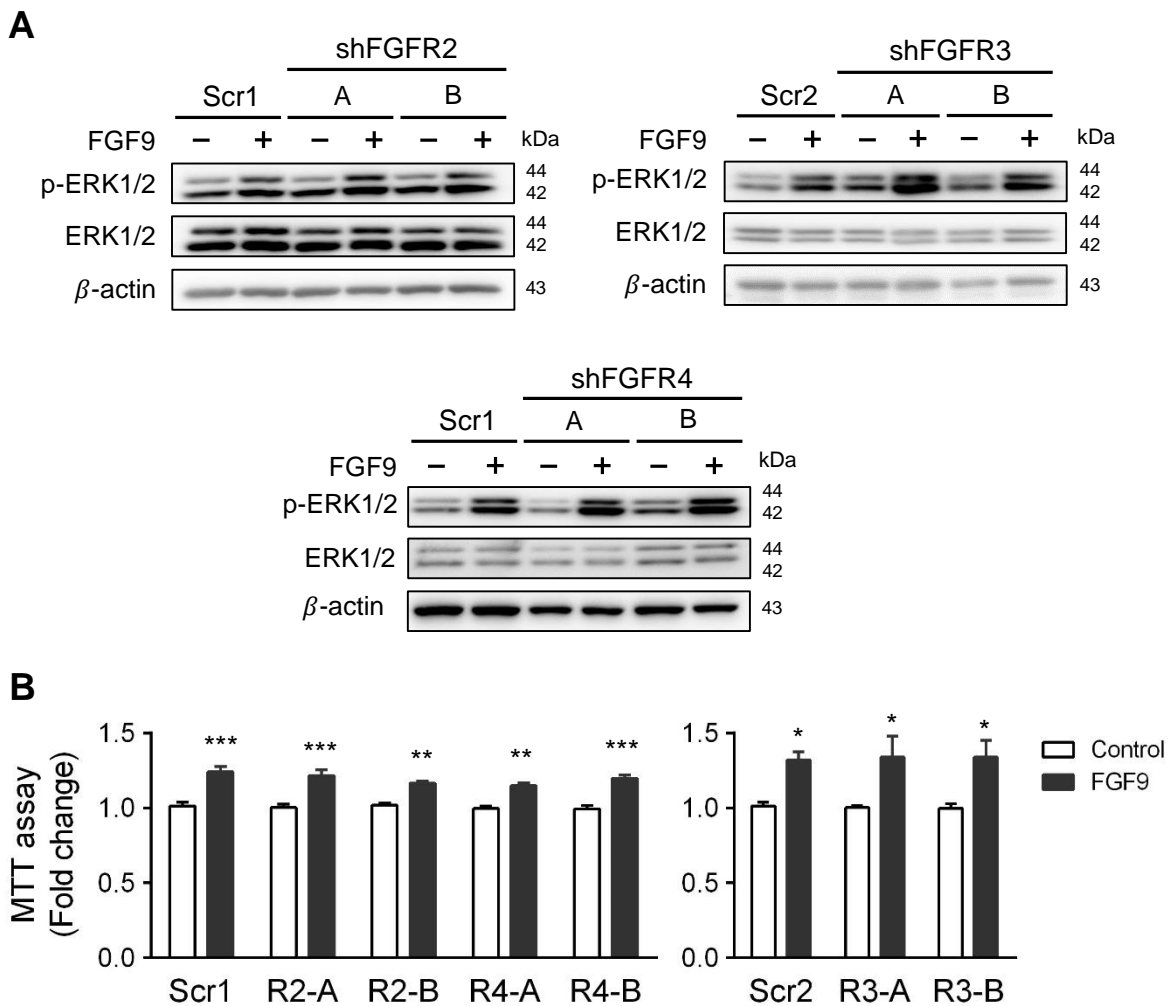

**Figure S3. Lentiviral shRNA silencing of FGFR1 inhibited FGF9-induced ERK1/2 phosphorylation and cell proliferation in LLC cells.** (A) The FGFR2-4 knockdown (shFGFR2, shFGFR3, and shFGFR4) LLC cells and their scrambled control [Scr1 for shFGFR2 and shFGFR4; Scr2 for shFGFR3 (Table S3)] were treated with 0 (Control) or 50 ng/ml FGF9 for 0.25 hour. Levels of ERK1/2 and p-ERK1/2 expressions were analyzed by Western blot assay. (B) MTT assay for cell proliferation of shFGFR2, shFGFR3, and shFGFR4 LLC cells treated with 0 (Control) or 50 ng/ml FGF9 or BSA (vehicle control) for 24 hours. All values are represented as the mean  $\pm$  SEM;  $n=6$ . The data were analyzed by two-way ANOVA with Sidak's multiple comparisons post-tests; \* $p<0.05$ , \*\* $p<0.01$  and \*\*\* $p<0.001$  vs. the Control group.
